# Supplementary material
Source: PubMed Central journal article supplement (PMC3074353)
Supplement: NIHMS275440-supplement-1_si_001.pdf [file NIHMS275440-supplement-1_si_001.pdf]

## Supporting Information

### Substrate Specificity of Protein Tyrosine Phosphatases 1B, RPTP $\alpha$ , SHP-1, and SHP-2<sup>†</sup>

Lige Ren, Xianwen Chen, Rinrada Luechapanichkul, Nicholas G. Selner, Tiffany M. Meyer, Anne-Sophie Wavreille, Richard Chan, Caterina Iorio, Xiang Zhou, Benjamin G. Neel, and Dehua Pei

**Table S1.** *S. antibioticus* Tyrosinase Substrates Selected from MX<sup>1</sup>X<sup>2</sup>X<sup>3</sup>X<sup>4</sup>X<sup>5</sup>LNBBRM-PEGA Library (randomly picked from ~20% colored beads)

| Intensely Colored<br>(42) |                |                |                | Medium Colored<br>(18) |                        | Lightly Colored<br>(20) |                |
|---------------------------|----------------|----------------|----------------|------------------------|------------------------|-------------------------|----------------|
| <b>Y</b> ASSA             | CD <b>Y</b> SE | <b>Y</b> EEQP  | A <b>Y</b> EQT | FEP <b>Y</b> A         | <b>Y</b> DV <b>Y</b> M | H <b>Y</b> NYA          | E <b>Y</b> ASN |
| GG <b>Y</b> YA            | <b>Y</b> QTTE  | P <b>Y</b> NSP | PV <b>Y</b> YT | M <b>Y</b> SFF         | <b>Y</b> FDDP          | F <b>Y</b> CGC          | <b>Y</b> AFLM  |
| PQ <b>Y</b> GC            | <b>Y</b> DNAG  | I <b>Y</b> CTP | LDE <b>Y</b> A | <b>Y</b> NLNF          | <b>Y</b> SH <b>Y</b> T | V <b>Y</b> YPD          | DT <b>Y</b> PS |
| DQ <b>Y</b> YC            | LA <b>Y</b> EG | AE <b>Y</b> SQ | ACH <b>Y</b> A | D <b>Y</b> TVF         | <b>Y</b> CSEV          | L <b>Y</b> IAF          | LI <b>Y</b> AD |
| HE <b>Y</b> AD            | HLS <b>Y</b> G | CGH <b>Y</b> Q | CGTC <b>Y</b>  | CGQ <b>Y</b> F         | HELE <b>Y</b>          | FC <b>Y</b> EF          | HPPE <b>Y</b>  |
| <b>Y</b> VDGD             | A <b>Y</b> SQH | <b>Y</b> NNAS  | DAQ <b>Y</b>   | GL <b>Y</b> FG         | LLNG <b>Y</b>          | ID <b>Y</b> HH          | ING <b>Y</b>   |
| DD <b>Y</b> ND            | DGE <b>Y</b> I | <b>Y</b> SEHS  | QSG <b>Y</b>   | <b>Y</b> H <b>Y</b> NG | <b>Y</b> IHI <b>Y</b>  | FI <b>Y</b> SI          | LVFG <b>Y</b>  |
| APG <b>Y</b> D            | <b>Y</b> ENPL  | <b>Y</b> HHSS  | EHQ <b>Y</b>   | QC <b>Y</b> IH         | PTFM <b>Y</b>          | <b>Y</b> HD <b>Y</b> I  | GNPH <b>Y</b>  |
| <b>Y</b> HQHE             | I <b>Y</b> SGN | P <b>Y</b> DTS | VHAS <b>Y</b>  | LL <b>Y</b> MH         |                        | IPP <b>Y</b> L          | MIAQ <b>Y</b>  |
| D <b>Y</b> DIE            | <b>Y</b> LNPP  | QDT <b>Y</b> S |                | ML <b>Y</b> YN         |                        | FT <b>Y</b> CN          | DC <b>Y</b> TY |
| <b>Y</b> THQE             | <b>Y</b> CSPP  | L <b>Y</b> GNT |                |                        |                        |                         |                |

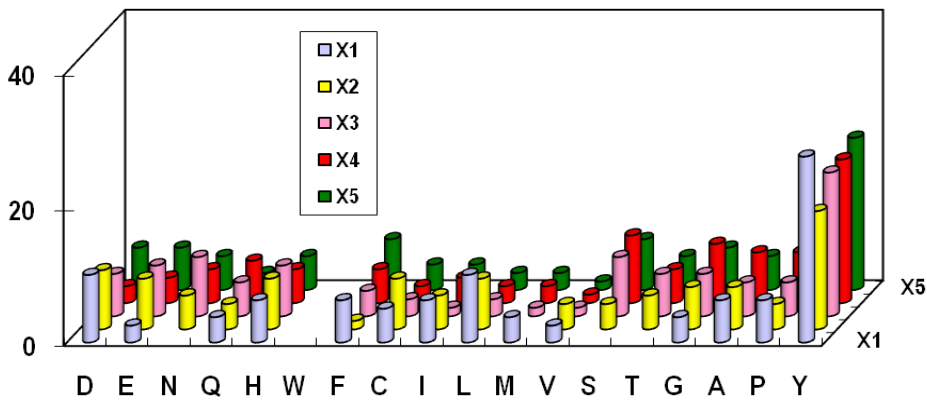

**Figure S1.** Sequence independence of *S. antibioticus* tyrosinase. The y axis represents the percentage of selected peptides that contained a particular amino acid (x axis) at a given position within the peptide (X<sup>1</sup> to X<sup>5</sup>, on the z axis). C, Abu; M, Nle.

**Table S2.** Most Preferred PTP1B Substrates Selected from Library I (SAXXXXXpYAABBRM-resin; total of 322 sequences from 15 independent screening experiments)<sup>a</sup>

| Class I |        |       |        |       | Class II |        |        |       |
|---------|--------|-------|--------|-------|----------|--------|--------|-------|
| ADHDW   | DSQDT  | FRQNV | LEGNV  | VTDSM | AQWRF    | RQRYT  | TRWNR  | RKWHF |
| ADHFW   | DTADV* | FSDFD | LEHDG  | SEWIN | EWRRV    | RRFHP  | WARRS  | RLRXX |
| AKREW   | DTEQD  | FSDSD | LFEWD  | SLNFE | FFHRR    | QPKKK  | WKFNR  | RNRIH |
| ASENL   | DTGDM  | FSFNN | LQYDN  | SPEGP | FKFRT    | PRARM  | WKKDR  | RMRHR |
| ASHNQ   | DTLGN  | FSGNM | LWEKD  | SRHEW | FRIRR    | RRRSD  | WKQRT  | RPRRH |
| ASLTD   | DTNAV  | FSHFE | MFTDD  | SSENA | FRKRV    | RRHGF  | WKRKA  | RRGHM |
| ASMTN   | DTQTM  | FSISP | MHMMA  | SSFDV | FRRFA    | RRHNL  | WKRKH  | RRGRS |
| ASQDN   | DTSWE  | FSSDD | MSLGD  | STENQ | FRRHV    | RRIIN  | WKRSR  | RRHFA |
| ASSDD*  | DTWDV  | FSTSM | NDHDL  | STGNN | FRYIK    | RRIRQ  | WMRKQ  | RRHQK |
| ATDDL   | DVWDA  | FSWDE | NDLYE  | TDLWL | HQYRR    | RRIST* | WRRNT  | RRISS |
| ATENL   | DVWDF  | FTDAE | NDWNP  | TGTGH | HRRRV    | RRKAM  | XKHRI  | RRKAI |
| ATGLL   | DWDIS  | FTDQA | NETSE  | TIPVY | IRRHF    | RRNRP  | YRRRM  | RRKAW |
| ATGQD   | DWDTA  | FTDQD | NHLES  | TQENM | KRHRF    | RRPTS  | ARKRI* | RRNFA |
| ATGSS   | DWEHM  | FTEFI | NSSLD  | TWFDT | KRKLK    | RRQFS  | RRRHI  | RRNQK |
| ATHFE   | EDAFW  | FTHDQ | NWDDA  | VEQDV | KRSRM    | RRQHI  | RWKQS  | RRQTA |
| ATMID   | EDWEA  | FTISD | PDHEM  | VITDY | LRRRM    | RRQRF  | TRRGI  | ARKRM |
| ATNMA   | EDWGP  | FTKDE | PFDEP  | VSANQ | PKRRF    | RRQSL  | QRRRS  | FKNRS |
| ATRPP   | EESHL  | FTMAA | PFXED  | VSFDM | QMRRF    | RRRFQ  | RAHRH  | FRNRQ |
| ATQND   | EFDIS  | FTNRQ | PSWDM  | VSNGV | RFFRN    | RRRGF  | RARRF  | GRRQI |
| ATVSQ   | EGDVD  | FTPEI | PTFGA  | VTKDD | RFRGK    | RRRXX  | RHRPG  | GRRFR |
| AVWEM   | EIWND  | FTSGA | PTKDA  | VTNDA | RGHKL    | RRSNI  | RIHKA  | KFNHR |
| AWFEW   | EMPDM  | FTSGL | PTVGL  | VTQDQ | RGMRH    | RRSRQ  | RIKXX  | KKRFA |
| AWMTW   | EMPXX  | FYRAE | QDVDA  | WDTDI | RGRHF    | RRSWA  | RKFRR  | KNRKE |
| DASQD   | EMPYI  | GSANQ | QEGMW  | WEDIA | RHRFG    | RRWGA  | RKHTF  | KRKVF |
| DDAWS   | EQNAW  | HFTNE | QGTGS  | WEDQF | RHRKM    | RRYPT  | RKKGI  | KRRXX |
| DDWDV   | ESFDA  | HIDDV | QIPDW  | WEHSD | RIRFR    | RVNRT  | RKRNY  | LKRRV |
| DDWNW   | ESFDQ  | HSESN | QENENQ | WGGLD | RKFAR    | RVRRH  | RKRPI  | NKKRW |
| DEWFS   | ETDFA  | HTNRQ | QTDDT  | WGTDS | RKGRH    | RWKTR  | RKRLK  | MRRNR |
| DEYQM   | ETFGQ  | HWESM | QTDGD  | WHFDA | RKNHS    | RWRAI  | RKSNP  | VRRSA |
| DFPAQ   | ETGFD  | IRDEP | QTKDA  | WNTTD | RKRNI    | TRHRS  | RKTKW  | WKNKS |
| DFWDT   | ETGMV  | ISDNS | RFAIY  | WQNNK |          |        |        |       |
| DGINI   | ETPIA  | ETNDF | RFQHA  | WSKDA |          |        |        |       |
| DGTNS   | ETDSW  | ISNSN | RHQWA  | WTEDS |          |        |        |       |
| DMFDV   | ETSGS  | ITEEA | RHVQT  | WVEDI |          |        |        |       |
| DMIDV   | ETWDD  | ITGDW | RQTNA  | WVWGH |          |        |        |       |
| DSDAW   | ETWTS  | ITMDQ | RRANI  | WWDAD |          |        |        |       |
| DSEQI   | EWSEM  | ITNND | RRFQE  | YHYDA |          |        |        |       |
| ATIND   | EYDWE  | IWINA | RRLNV  | TDESD |          |        |        |       |
| DSFDW   | FDYQM  | KFQED | RTDSI  |       |          |        |        |       |
| DSMDI   | FGSDS  | KQTTQ | RTHDM  |       |          |        |        |       |
| DSMNI   | FPAXX  | KTIWD | RWQTT  |       |          |        |        |       |

<sup>a</sup>M, Nle; X, amino acid whose identity could not be unambiguously determined; Y, F<sub>2</sub>Y.

\* Sequences selected for kinetic analysis.

**Table S3.** Peptides that are resistant to PTP1B dephosphorylation (colorless beads selected from Library I, SAXXXXXpYAABBRM-resin). M, Nle; X, unidentified amino acid; Y, F<sub>2</sub>Y.

|       |       |       |       |       |       |
|-------|-------|-------|-------|-------|-------|
| MAGWI | IFKLW | IIFQQ | SLTFI | LMMMG | IVMWA |
| SAFFI | VFMGW | IIGMV | WLRVI | XMMII | LVFAW |
| TAFII | VFVAW | IITXX | WLTVV | ITIIR | LVMFA |
| VATVF | FGGIW | KIGFF | AMIMV | ITMQW | MVMWF |
| FFVEF | IGFFM | MIFWV | FMVMQ | LTIVV | VVFIF |
| FFVVG | EIFFV | LLTMM | HMVVI | FVMMV | SWWWW |
| NFINI | EIIIK | SLFII | LMFEW | FVFMF |       |

**Table S4.** Most Preferred PTP1B Substrates Selected from C-Terminal Libraries II (W[TS][DE][DE]VpYXXXX-LNBBRM-PEGA) and III (WAAAAPYXXXXNNBBRM-PEGA)<sup>a</sup>

| Library II   | Library III  |              |              |        |       |
|--------------|--------------|--------------|--------------|--------|-------|
|              | Class I      |              | Class II     |        |       |
| WSDDVpYSFAF  | <u>FEDED</u> | <u>DWDIW</u> | <u>DQEFI</u> | KRKFA  | QRRNR |
| WSDDVpYWDWA  | <u>WEDYE</u> | <u>EMDEW</u> | <u>DEDWT</u> | NIRRH  | RRQPR |
| WXXXVpYWDDW  | <u>YDEDF</u> | <u>EADDF</u> | <u>ENDTW</u> | RSYHI  | HRARR |
| WXXXVpYXXEA  | <u>WDEIG</u> | <u>QADWE</u> |              | RLRKI  | RLPRR |
| WSDDVpYWSEF  | <u>WEDQG</u> |              | GFEXX        | KRHRI  | TVRRR |
| WXXXVpYTREW  | <u>FDDIN</u> | <u>DDFFF</u> | MDXXX        | RFERRI | RKQWR |
| WXXXVpYXXEW  | <u>FDDIP</u> | <u>DDYGP</u> | DXXXX        | LTRRI  | NRRFS |
| WXXXVpYXXEW  | <u>WDDIW</u> | <u>DEFHY</u> | DXXXX        | RIRIK  | GKRRS |
| WXXXVpYXIEW  | <u>WDKRR</u> | <u>EEFFI</u> | EXXXX        | RRRIK  | KRRRS |
| WSDDVpYDTFW  | <u>FNSDF</u> | <u>EEYEF</u> |              | RRIRK  | SRRRV |
| WSEDVpYSWQM  | <u>YDGGF</u> | <u>EDFWD</u> |              | ITRRK  | GKRXX |
| WTDDVpYAWSF  | <u>SDELM</u> | <u>EEWSE</u> |              | TRWRK  | RQRXX |
| WSDEVpYDMWD  | <u>QDEMF</u> | <u>EEWDM</u> |              | XXRTK  | RRRXX |
| WXXXVpYXQWD  |              |              |              | RFRRN  | XHRNV |
| WSEDVpYWEWE  | <u>WIDEI</u> | <u>DWWEV</u> |              | RNKRP  | RAQIR |
| WSDDVpYWDWS  | <u>WWDEE</u> | <u>EWWDs</u> |              | HRNHR  | RQRMR |
| WTEDVpYXXXXY | <u>YWHDE</u> | <u>DAMDF</u> |              | RNMKR  |       |
|              | <u>TWDEK</u> | <u>VDYNY</u> |              | RNPKR  |       |
|              | <u>TVDFE</u> | <u>SNMPE</u> |              |        |       |

<sup>a</sup>M, Nle; X, unidentified amino acids; Y, F<sub>2</sub>Y.

**Table S5.** Most Preferred PTP1B Substrates Selected from Library VI (ANNX<sup>6</sup>X<sup>5</sup>X<sup>4</sup>X<sup>3</sup>X<sup>2</sup>X<sup>1</sup>AABRRM-PEGA; total of 129 sequences from 5 independent screening experiments)<sup>a</sup>

| Class I     |             |           |           | Class II |
|-------------|-------------|-----------|-----------|----------|
| pYpYpYIRpY  | pYWTWpYpY   | FpYEpYWpY | DApYEDpY  | RREXXpY  |
| pYpYpYNVpY  | pYIWQpYpY   | VpYTpYIpY | DApYIEpY  | RRRPKpY  |
| pYpYpYpYpYW | pYSWGpYpY   | HpYFEpYpY | EApYWWpY  | RRHRFpY  |
| pYpYIpYWH   | pYWGPpYpY   | YpYSEpYpY | XXpYWEpY  | RRQWHpY  |
| pYpYFRpYpY  | pYWTIpYpY   | XpYWLpYpY | VWpYNDpY  | RRSHQpY  |
| pYpYHLpYpY  | pYEWYEpY    | XpYWLpYpY | FGpYAWpY  | KMRRFpY  |
| pYpYpVpYpY  | pYEWGpY     | QpYWPpYpY | AGpYSWpY  | RFKRNpY  |
| pYpYGDWpY   | pYEVWMpY    | DpYDWDpY  | XXpYPWpY  | RNKRVPY  |
| pYpYATWpY*  | pYEISMpY    | VpYEIWPY  | XXpYWGpY  | RHIRWpY  |
| pYpYHSWpY   | pYFDDWpY    | MpYDYWPY  | WGpYNMpY  | RQTRIPY  |
| pYpYMMHpY   | pYADWWpY    | YpYDPWPY  | NGWpYpYpY | RNIFRpY  |
| pYpYQXXpY   | pYFVDFpY    | WpYFDEpY  | XXWpYpYpY | RNXXXpY  |
| pYpYEVWpY   | pYWLENpY    | WpYNDWpY  | XXXpYpYpY | MKRRIPY  |
| pYpYWNVpY   | pYFPIWPY*   | GpYMEWPY  | WEFpYQpY  | QRRRMpY  |
| pYDpYGFpY   | pYNSMWpY    | XpYIDWPY  | AMDpYMpY  | XKRRQpY  |
| pYFpYDFpY   | pYVSGWpY    | XpYVDWpY  | YTEpYTpY* | XRRGApY  |
| pYFpYMDpY   | pYXXXXpY    | WpYFDVpY  | FWSpYRpY  | ARWARpY  |
| pYWpYTEpY   | NpYpYpYpYpY | VpYADHpY* | FAPpYWpY  | XARHRpY  |
| pYGpYAFpY   | XpYpYpYFpY  | YpYNAWPY  | XWVpYGpY  | ANRWIPY  |
| pYMpYGMpY   | FpYpYFDpY   | ApYAPWPY  | XEAWpYpY  | QARFVpY  |
| pYWRpYpYpY  | WpYpYMRpY   | EIpYpYWpY | VWEFpYpY* | LAMRTpY  |
| pYWEpYMpY   | IpYpYPWpY   | IGpYpYDpY | DAFWEpY*  | LpYHRWR  |
| pYGGpYFpY   | WpYpYWNpY   | QWpYpYpY  | KFEDTpY   |          |
| pYTQpYWpY   | WpYpYTapY   | GIpYpYMpY | QXXXDpY   |          |
| pYWVpYTpY   | XpYpYWDpY   | WFpYGpYpY | XXXWApY   |          |
| pYMLpYHpY   | XpYpYWLpY   | XWpYpYpY  | XXXFQpY   |          |
| pYIWDpYpY   | FpYDpYFpY   | DEpYFWpY  |           |          |

<sup>a</sup>M, Nle; X, amino acid whose identity could not be unambiguously determined; Y, F<sub>2</sub>Y.

\*Sequences selected for kinetic analysis.

**Table S6.** Most Preferred SHP-1 Substrates Selected from Library I (SAXXXXXpYAABBRM-PEGA; total of 230 sequences from six independent screening experiments)<sup>a</sup>

|          |          |          |          |          |          |          |          |          |          |   |   |   |   |   |          |          |          |          |          |   |   |   |   |   |
|----------|----------|----------|----------|----------|----------|----------|----------|----------|----------|---|---|---|---|---|----------|----------|----------|----------|----------|---|---|---|---|---|
| W        | D        | E        | D        | D        | M        | W        | E        | W        | E        | W | D | E | E | W | S        | E        | I        | D        | W        | T | D | E | W | F |
| M        | E        | D        | D        | D        | W        | M        | E        | F        | D        | F | D | D | E | W | W        | D        | Y        | D        | S        | A | D | E | Y | F |
| W        | F        | D        | E        | E        | F        | W        | E        | N        | E        | A | E | D | D | W | W        | E        | W        | E        | P        | W | D | D | S | F |
| S        | W        | D        | D        | E        | W        | W        | D        | G        | D        | V | E | E | D | W | I        | E        | W        | D        | S        | W | E | D | V | F |
| P        | W        | D        | D        | E        | <b>F</b> | <b>Y</b> | <b>D</b> | <b>I</b> | <b>D</b> | F | D | E | E | L | N        | E        | Y        | D        | M        | Q | D | D | Q | W |
| W        | T        | D        | D        | D        | W        | S        | E        | Q        | D        | N | E | D | D | I | I        | D        | W        | D        | I        | I | D | D | Q | W |
| W        | L        | E        | D        | D        | W        | M        | D        | N        | E        | Q | E | D | D | M | G        | D        | W        | D        | M        | G | D | E | M | W |
| W        | A        | D        | D        | E        | W        | T        | D        | M        | D        | D | Q | D | E | W | I        | D        | Y        | D        | M        | W | E | D | Y | S |
| W        | A        | D        | E        | D        | W        | V        | E        | A        | D        | D | L | D | D | W | A        | E        | W        | E        | A        | Y | D | E | F | T |
| W        | M        | D        | E        | E        | G        | T        | D        | A        | D        | E | M | D | D | W | W        | D        | S        | D        | S        | W | D | E | F | L |
| W        | D        | W        | D        | E        | E        | E        | W        | I        | D        | D | W | D | D | A | F        | E        | S        | D        | T        | I | D | D | Y | S |
| W        | E        | Y        | D        | E        | E        | D        | V        | N        | D        | E | F | E | D | M | W        | D        | G        | D        | M        | M | D | E | W | S |
| W        | E        | W        | E        | E        | D        | E        | T        | G        | D        | D | T | E | E | Q | <b>F</b> | <b>D</b> | <b>I</b> | <b>D</b> | <b>I</b> | T | E | D | F | I |
| I        | D        | Y        | D        | D        | W        | E        | N        | Y        | E        | D | P | D | D | M | E        | H        | W        | D        | F        | P | E | D | W | I |
| D        | L        | W        | D        | E        | F        | E        | S        | Y        | E        | D | L | D | D | V | D        | S        | F        | D        | W        | P | D | E | F | I |
| E        | W        | T        | D        | E        | W        | D        | G        | W        | D        | E | L | E | D | V | D        | L        | F        | D        | F        | W | E | D | S | T |
| D        | W        | P        | D        | D        | F        | E        | M        | F        | D        | W | H | E | D | F | <b>E</b> | <b>I</b> | <b>F</b> | <b>D</b> | <b>F</b> | W | D | E | G | S |
| N        | W        | F        | D        | D        | M        | E        | S        | W        | D        | H | W | D | E | M | E        | F        | T        | D        | W        | W | D | E | Q | V |
| P        | F        | F        | D        | D        | I        | D        | A        | W        | E        | N | F | E | D | F | E        | F        | T        | D        | Y        | W | D | E | A | I |
| I        | W        | Y        | E        | D        | F        | E        | Y        | N        | D        | I | T | D | D | W | E        | L        | L        | D        | F        | L | E | E | S | I |
| W        | A        | W        | E        | D        | W        | D        | W        | A        | D        | I | G | D | D | W | D        | Y        | W        | D        | I        | E | S | D | F | W |
| A        | V        | W        | D        | D        | W        | E        | F        | I        | D        | I | A | D | D | Y | E        | F        | F        | D        | M        | D | W | D | N | W |
| P        | M        | W        | E        | D        | M        | E        | W        | I        | D        | V | I | D | D | Y | E        | P        | W        | E        | N        | D | W | D | F | S |
| F        | W        | L        | D        | E        | F        | E        | T        | T        | D        | G | G | E | D | W | E        | G        | Y        | D        | M        | D | W | E | F | T |
| L        | W        | Q        | D        | E        | W        | D        | G        | T        | D        | A | W | D | D | S | D        | F        | N        | D        | T        | D | Y | E | Y | L |
| I        | W        | N        | E        | D        | W        | D        | S        | V        | D        | T | W | E | D | M | E        | W        | V        | D        | T        | D | W | E | V | Q |
| M        | W        | N        | E        | D        | W        | E        | T        | V        | D        | I | W | E | D | I | E        | W        | G        | D        | M        | E | W | D | A | M |
| I        | W        | P        | D        | D        | W        | D        | L        | G        | D        | I | W | D | E | P | P        | F        | W        | D        | M        | F | W | E | Q | T |
| W        | M        | N        | D        | E        | E        | N        | W        | Y        | E        | W | Q | D | D | T | G        | N        | W        | D        | M        | W | F | D | N | L |
| <b>W</b> | <b>A</b> | <b>G</b> | <b>D</b> | <b>D</b> | D        | T        | F        | Y        | E        | Y | L | E | D | S | W        | F        | P        | D        | Q        | A | S | E | S | N |
| W        | I        | A        | D        | D        | E        | Y        | Q        | Y        | D        | F | S | E | D | V | F        | M        | N        | D        | I        | E | E | S | W | W |
| S        | T        | N        | D        | E        | D        | W        | A        | F        | D        | W | N | D | E | I | A        | S        | N        | D        | N        | D | D | V | F | W |
| M        | G        | S        | D        | D        | D        | F        | P        | W        | D        | I | T | D | D | Q | T        | S        | N        | D        | V        | E | E | W | G | Y |
| D        | D        | D        | T        | D        | E        | F        | G        | W        | E        | V | S | D | D | L | P        | T        | S        | D        | I        | D | D | V | V | W |
| D        | E        | D        | I        | E        | E        | W        | W        | T        | D        | E | E | H | D | W | D        | E        | E        | H        | W        | D | D | L | F | L |
| E        | D        | E        | M        | D        | D        | Y        | W        | P        | D        | D | D | Y | D | Y | E        | D        | E        | W        | F        | E | D | I | F | M |
| W        | E        | D        | N        | E        | D        | M        | W        | T        | D        | D | E | Q | D | W | D        | D        | E        | T        | W        | E | E | W | G | M |
| W        | E        | E        | Q        | D        | D        | W        | T        | S        | D        | E | D | S | D | F | D        | D        | D        | A        | F        | A | E | W | Q | W |
| W        | D        | D        | I        | E        | E        | W        | I        | N        | D        | D | D | Y | D | I | D        | E        | D        | W        | N        | F | D | W | N | V |
| E        | W        | D        | Q        | E        | D        | W        | Q        | I        | D        | E | E | W | D | V | D        | D        | D        | F        | I        | G | E | S | G | T |
| D        | W        | D        | I        | D        | N        | Y        | F        | P        | E        | G | D | W | D | W | D        | E        | D        | Y        | L        | E | W | G | V | Q |
| D        | Y        | D        | G        | D        | W        | F        | L        | P        | D        | M | D | W | D | F | E        | D        | E        | G        | T        | Q | W | F | S | H |
| D        | W        | D        | L        | E        | F        | Q        | V        | N        | D        | P | D | F | D | W | D        | D        | D        | N        | I        | W | S | F | I | P |
| D        | Q        | D        | G        | D        | E        | E        | D        | E        | F        | V | E | W | D | Y | T        | E        | D        | F        | W        | T | F | T | G | A |
| G        | W        | E        | W        | D        | F        | D        | D        | D        | F        | A | E | Y | D | F | Q        | E        | D        | Y        | F        | Y | M | P | Q | Q |
| A        | F        | D        | Y        | E        | W        | E        | E        | D        | F        | I | D | T | E | W | N        | D        | D        | F        | Y        | Q | G | T | S | P |

<sup>a</sup>M, Nle; Y, F<sub>2</sub>Y. Bold-faced sequences were selected for kinetic analysis.

**Table S7.** Most Preferred SHP-2 Substrates Selected from Library I (SAXXXXXpYAABBRM-PEGA; total of 255 sequences from eight independent screening experiments)

|   |   |   |   |   |   |   |   |   |   |   |   |   |   |   |   |   |   |   |   |   |   |   |   |   |   |
|---|---|---|---|---|---|---|---|---|---|---|---|---|---|---|---|---|---|---|---|---|---|---|---|---|---|
| E | E | D | E | D | S | W | E | S | D | F | K | D | D | I | F | E | A | D | W | D | E | E | N | S |   |
| D | W | D | D | D | T | W | E | S | D | F | Y | E | D | F | P | D | L | D | W | E | D | E | S | M |   |
| W | N | D | D | D | W | N | E | N | D | W | F | D | E | F | L | E | P | E | W | E | D | D | N | L |   |
| F | Q | E | D | D | W | M | E | T | E | L | F | D | D | W | F | D | F | D | I | W | E | D | Q | W |   |
| F | T | E | D | E | W | I | D | I | D | I | W | E | E | F | F | D | F | D | L | A | D | D | L | W |   |
| W | I | D | E | D | D | E | F | W | D | V | W | E | E | F | F | E | W | E | V | W | E | E | F | N |   |
| W | D | H | D | E | D | E | Y | Y | D | F | Q | D | D | W | I | E | Y | D | T | I | D | D | W | S |   |
| N | D | Y | E | D | E | D | Y | Y | E | F | N | D | E | F | I | D | Y | D | M | S | E | E | W | I |   |
| I | D | W | D | E | E | E | V | W | D | W | V | E | D | F | M | E | F | D | I | I | D | D | Y | L |   |
| P | D | Y | D | E | D | E | M | W | E | W | A | E | E | Y | A | E | W | E | M | W | D | D | S | S |   |
| W | D | S | D | D | E | D | W | G | D | M | L | E | E | W | F | D | N | E | T | W | D | D | Q | T |   |
| W | E | Q | D | D | E | E | W | I | D | F | W | E | E | S | F | E | I | D | T | W | E | D | T | T |   |
| W | D | S | E | D | F | E | F | W | E | W | F | D | D | I | F | E | N | D | I | W | E | E | Q | S |   |
| F | D | L | D | E | F | D | Y | F | D | F | W | E | D | I | F | W | D | A | D | V | F | E | D | S | T |
| F | E | M | E | E | W | D | N | W | D | F | W | D | E | A | W | E | P | E | V | W | D | D | S | A |   |
| F | D | I | E | D | I | E | W | T | D | T | W | D | D | T | D | T | W | D | Y | W | D | E | T | L |   |
| E | W | H | D | D | I | E | W | T | D | I | F | D | D | S | V | Y | M | D | F | I | D | D | I | N |   |
| E | Q | F | D | E | W | D | N | T | D | V | W | D | D | M | D | Y | M | D | F | D | Y | M | D | F |   |
| D | A | F | D | D | W | E | P | N | D | G | W | E | D | I | D | Y | M | D | F | E | Q | Q | D | W |   |
| D | G | F | D | E | W | E | T | G | E | A | W | E | D | V | E | Q | Q | D | W | D | N | D | W | F |   |
| D | W | I | E | E | D | F | Y | W | D | W | Q | E | D | T | D | L | V | D | W | E | W | D | S | W |   |
| W | Y | H | D | D | D | N | Y | W | E | W | T | E | D | N | E | Y | F | D | I | D | I | D | S | W |   |
| I | F | W | E | D | E | W | N | W | E | W | Q | D | D | L | D | L | W | E | T | D | M | D | N | W |   |
| I | F | Y | E | D | D | W | V | W | D | F | S | E | D | A | D | L | F | D | M | D | M | D | N | W |   |
| F | Q | F | D | D | E | W | G | W | D | F | Q | E | D | V | D | V | W | D | M | E | Y | E | W | S |   |
| W | Q | W | E | D | D | A | W | S | D | D | A | W | S | D | F | S | E | D | V | E | M | W | D | I |   |
| W | P | Y | E | D | E | N | F | G | D | F | T | E | D | P | E | G | F | D | I | E | W | E | W | I |   |
| F | M | F | E | D | D | S | M | N | E | W | M | D | D | P | D | W | S | D | S | D | S | E | F | M |   |
| F | W | Q | D | E | E | D | D | D | I | W | L | D | E | I | E | F | I | D | T | E | A | D | W | M |   |
| W | W | V | D | D | F | E | E | D | F | W | G | D | E | I | D | W | S | E | A | E | I | E | W | M |   |
| W | Y | P | D | E | W | E | D | E | F | W | I | E | E | V | D | W | M | D | I | D | W | D | S | L |   |
| W | Q | V | D | D | M | D | E | D | W | Y | P | E | D | L | E | W | L | D | I | D | W | D | Q | V |   |
| V | D | E | W | E | I | D | E | D | Y | S | M | D | D | T | D | F | G | D | V | E | W | D | Q | V |   |
| W | E | E | S | D | A | E | E | D | Y | I | T | E | D | M | D | S | I | D | S | E | W | D | L | V |   |
| W | D | D | Q | D | W | E | D | D | L | L | G | E | D | V | D | T | M | D | M | E | T | D | S | T |   |
| W | E | E | T | D | W | D | E | E | I | D | D | M | D | W | V | W | N | D | F | F | H | E | S | F |   |
| F | D | D | N | E | N | D | D | E | I | E | D | G | D | W | W | S | Q | D | F | Q | M | D | F | M |   |
| W | E | D | M | E | P | D | D | E | M | E | E | L | D | F | F | M | Q | D | F | W | V | D | Q | S |   |
| F | D | D | I | D | E | F | E | D | F | E | D | I | E | W | N | A | W | E | M | L | M | E | S | M |   |
| E | F | D | W | D | E | W | E | E | W | D | E | W | D | V | W | Y | P | D | M | M | M | E | S | M |   |
| D | T | E | W | E | D | Q | E | D | F | E | E | V | D | T | G | W | Q | D | V | D | D | I | N | W |   |
| E | V | E | Y | D | D | A | E | D | W | D | D | P | D | I | W | N | N | D | M | E | E | Q | W | T |   |
| D | W | D | S | E | D | F | E | D | S | D | E | M | D | A | W | A | Q | D | I | D | E | F | S | V |   |
| E | W | D | V | D | D | W | E | E | T | E | E | L | D | M | W | P | V | D | V | E | E | N | S | I |   |
| T | W | E | Y | E | D | W | D | D | V | E | D | P | E | V | D | E | E | W | W | W | E | A | T | W |   |
| L | F | E | W | E | D | W | E | E | V | A | D | F | D | F | E | E | E | F | W | G | D | F | N | I |   |
| W | N | E | F | E | E | W | D | E | M | I | D | W | D | Y | D | E | D | T | W | W | E | Q | G | I |   |
| W | V | D | Y | E | E | W | E | E | A | W | E | S | E | Y | E | E | E | W | S | W | D | T | G | I |   |
| F | M | D | W | E | D | D | T | E | V | W | D | L | D | F | D | E | D | F | M | D | P | H | V | V |   |
| F | P | D | W | E | D | Q | E | E | M | W | D | P | D | Y | E | D | D | Y | L | D | F | T | N | M |   |
| I | T | D | Y | D | E | G | D | D | I | F | D | G | D | F | D | D | D | T | T | D | F | P | S | V |   |

M, Nle; Y, F<sub>2</sub>Y.

**Table S8.** Most Preferred Substrates Selected from Library II (W[TS][DE][DE]VpYXXXX-LNBBRM-PEGA; total of 71 complete and 9 partial sequences for SHP-1 and 51 complete and 5 partial sequences for SHP-2)

| SHP1         |               | SHP2        |              |
|--------------|---------------|-------------|--------------|
| Type I (29)  | WSEdVpYNDFW   | Type I (33) | Type II (11) |
| WSDDVpYWFAD  | WSDDVpYNDWW   | WTEDVpYWWDA | WTDDVpYADWW  |
| WSDDVpYFWDA  |               | WTDDVpYWWEW | WTEDVpYYDWS  |
| WSDDVpYWFDY  | Type III (23) | WTDDVpYWWFD | WTEDVpYWDSY  |
| WTEDVpYFWDN  | WSDDVpYEWAD   | WSDDVpYWWID | WTDEVpYWDWL  |
| WTDDVpYIWDW  | WTDDVpYEWDI   | WSDEVpYWWQW | WTDDVpYWELE  |
| WTDDVpYWYED  | WSEdVpYDWEp   | WTDDVpYWFey | WSDDVpYWESW  |
| WSDDVpYWVEE  | WTDDVpYDFEW   | WTDDVpYWFew | WTDEVpYWEWN  |
| WTEDVpYFWEF  | WTEDVpYDYEW   | WTEDVpYWYDV | WSDEVpYWEWD  |
| WTDDVpYWFEG  | WSEdVpYEGEW   | WTDEVpYWYEE | WSEdVpYFEEW  |
| WSEdVpYWWEG  | WTEDVpYDIFf   | WTEDVpYWYDV | WTDEVpYFEWW  |
| WTEDVpYWWEG  | WSDDVpYEIFY   | WTDEVpYWYEE | WSDDVpYWNFD  |
| WTEDVpYWWEG  | WTEDVpYEMFY   | WTDDVpYWGDF |              |
| WTDDVpYWFEL  | WSEdVpYDFYy   | WSDDVpYWIDY | Type III (8) |
| WTDDVpYWIEW  | WTDDVpYEGYw   | WTEDVpYWMEW | WTEDVpYDYyy  |
| WTDDVpYYFFE  | WSDDVpYEWGE   | WSDEVpYWVDW | WTDDVpYDLWF  |
| WSDDVpYWYFE  | WTDDVpYDYHW   | WSEdVpYWVWQ | WTDDVpYDMWW  |
| WTDDVpYYWID  | WTDDVpYDFIw   | WSEdVpYFWDA | WTDDVpYDWFM  |
| WSEdVpYWWID  | WTDDVpYDWNy   | WSDEVpYFWDW | WTDEVpYDWYD  |
| WTDDVpYWMTD  | WTDDVpYEYMy   | WSDEVpYFWEV | WTEDVpYDWQW  |
| WSEdVpYFFWD  | WSDEVpYDVFW   | WTDEVpYFWEV | WTDEVpYEWEF  |
| WSDEVpYFWDE  | WTDEVpYEVFW   | WTDEVpYFWTE | WTDEVpYEWEF  |
| WSDEVpYWVEF  | WSDEVpYDMWD   | WSDEVpYFWLE |              |
| WSDEVpYYWEF  | WXXXVpYNWEW   | WTeeVpYYWYD | Type IV (1)  |
| WSDEVpYWWEN  | WSDDVpYTWFD   | WTeeVpYYyDW | WTDDVpYDEMw  |
| WTDEVpYWTWD  | WTDEVpYTWYD   | WTEDVpYFFDF |              |
| WTEDVpYWFkw  | WTEDVpYsFWE   | WTDEVpYlWWD | WXXXVpYXEEW  |
| WTDEVpYIFWM  |               | WTDDVpYTWdW | WTDDVpYXXEi  |
| WSEdVpYYSEW  | Type IV (5)   | WTeeVpYTWdW | WSDDVpYXXXX  |
| WTEDVpYWSWE  | WTDDVpYDDWA   | WTDDVpYTWYe | WSDDVpYXXXXW |
|              | WSDDVpYEDeY   | WSDDVpYVWEF | WTDDVpYXXXX  |
| Type II (14) | WTDDVpYEDYw   | WSEdVpYAWeF |              |
| WTEDVpYWDDF  | WTEDVpYDEYw   | WTEDVpYAWeF |              |
| WSDDVpYWEED  | WTDEVpYEQYy   | WSDEVpYAWeF |              |
| WSEdVpYYEEW  |               |             |              |
| WSDDVpYWDFG  | WTXXVpYXEEW   |             |              |
| WTEDVpYWDYD  | WXXXVpYXWEW   |             |              |
| WSEdVpYFDWD  | WSDXVpYXWNW   |             |              |
| WTEDVpYWEWD  | WXXXVpYXdWY   |             |              |
| WSDDVpYWDWG  | WSEdVpYIXXy   |             |              |
| WTEDVpYWEWN  | WTEDVpYXXXXM  |             |              |
| WSDDVpYFEWT  | WSDDVpYEXXW   |             |              |
| WTDEVpYFDfE  | WSDDVpYWXXX   |             |              |
| WTEDVpYGDfW  | WSDDVpYXXXX   |             |              |

M, Nle; Y, F<sub>2</sub>Y; X, residues that could not be unambiguously determined.

**Table S9.** Most Preferred Substrates Selected from Library III (WAAAAPYXXXXXNNBBRM-PEGA; total of 33 complete sequences for SHP-1 and 41 complete sequences for SHP-2)

| SHP1  |       |       | SHP2  |       |       |       |
|-------|-------|-------|-------|-------|-------|-------|
| GYDED | DEYEA | EDYWS | AEDYF | DNFFE | DDWLE | QXXXW |
| NLDLE | DDDFE | EDFDT | FANHV | DSEME | DEYYF | TDXXX |
| TEDNM | DEHEF | EDTQV | FEEEY | DWDWT | EEEMF | DXXXD |
| GRGRI | DEPIF | DDVAW | YDDET | DFMDF | EDDSF | XXXDW |
|       | DDWNF | DDMEW | YDEEW | ESWDD | EDEDY |       |
| ETDYD | EDADY | EDWEW | WTDED | EFFDI | DDEFD |       |
| DLYDE | EDEEY |       | LDADY | EFMED | EEYQD |       |
| DWWE  | EDFGY | DDXXX | LEEDF | EFEEM | EEWPI |       |
| DFEYE | DDWGY | EXXXE | GDDEI | EFDDY | EDDVN |       |
| EFDSW | DDYEP | EXXRT | GEDWA | EWMED | EDQES |       |
| ETDDF | EDWTQ | EXXXT | GEDYY | EWLDE | DDEEW |       |
| EVDDG | EDEV  |       | GEWME | ELVDE | EEYEW |       |
| EMDEG |       |       | QEWDD | ENWEE | EDYSW |       |
| DVWEL |       |       |       | EWEE  |       |       |
| EVEEM |       |       |       | ERYIE |       |       |
| EVENQ |       |       |       |       |       |       |

M, Nle; Y, F<sub>2</sub>Y; X, residues that could not be unambiguously determined.

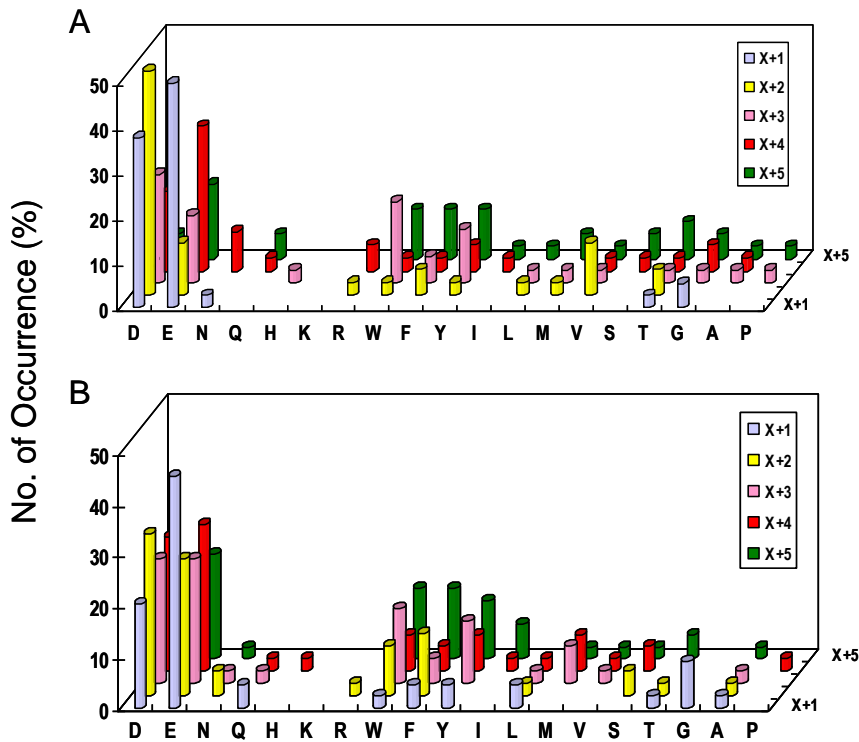

**Figure S3.** Amino acid composition of the most preferred substrates of SHP-1 (A) and SHP-2 (B) on the C-terminal side of pY (from screening against library III, WAAAAPYXXXXXNNBBRM-PEGA). The y axis represents the percentage of selected peptides that contained a particular amino acid (x axis) at a given position within the peptide (pY+1 to pY+5, on the z axis). M, Nle; Y, F<sub>2</sub>Y.



**Table S10. Most Preferred SHP-1 and SHP-2 Substrates Selected from Library IV (AXXXXXpYXXXXXXNNBRM-resin)\***

| SHP-1 |   |   |   |    |    |    |   |   |   |   |   |   |   |   | SHP-2 |    |    |   |   |   |   |   |   |   |   |    |    |    |    |   |   |   |   |
|-------|---|---|---|----|----|----|---|---|---|---|---|---|---|---|-------|----|----|---|---|---|---|---|---|---|---|----|----|----|----|---|---|---|---|
| Q     | N | S | D | E  | pY | E  | W | E | T | F | E | F | N | F | pY    | T  | W  | A | E | N | N | I | S | D | D | pY | W  | S  | D  | M | V |   |   |
| S     | F | W | E | D  | pY | T  | D | V | A | G | V | D | W | Q | N     | pY | D  | D | V | P | W | E | E | V | D | pY | Q  | E  | G  | F | L |   |   |
| P     | Q | W | E | D  | pY | F  | T | D | A | A | R | D | K | I | F     | pY | D  | I | D | E | E | I | S | E | F | D  | pY | M  | E  | A | Q | I |   |
| V     | R | Q | D | D  | pY | M  | W | E | N | V | P | E | N | T | F     | pY | E  | F | D | W | N | P | A | E | T | D  | pY | W  | A  | V | V | D |   |
| D     | N | E | A | E  | pY | A  | E | D | W | D | I | E | P | W | A     | pY | W  | A | E | T | Q | F | D | S | E | pY | L  | D  | M  | D | Q |   |   |
| W     | G | D | V | D  | pY | F  | S | L | G | D | E | G | N | W | A     | pY | W  | A | E | D | G | Q | E | S | I | D  | pY | N  | A  | W | E | T |   |
| N     | E | V | A | E  | pY | E  | L | D | W | E | D | T | I | N | W     | pY | D  | M | D | F | Q | D | F | W | D | pY | A  | D  | A  | S | W |   |   |
| D     | T | Q | E | pY | V  | E  | W | P | V | G | S | I | Q | F | pY    | D  | E  | W | D | A | D | F | F | F | E | pY | E  | P  | E  | E | L |   |   |
| T     | N | I | W | D  | pY | D  | D | F | W | Q | P | T | T | W | pY    | D  | E  | G | D | A | D | F | F | F | E | pY | E  | P  | E  | E | L |   |   |
| D     | I | N | W | D  | pY | A  | T | F | F | D | V | W | N | N | L     | pY | D  | P | F | E | D | D | F | I | E | pY | Q  | D  | N  | D | D |   |   |
| F     | I | E | D | V  | pY | D  | S | G | L | W | V | T | N | P | F     | pY | W  | D | E | A | E | E | E | P | N | G  | D  | pY | W  | M | D | P | I |
| E     | A | E | E | L  | pY | A  | I | P | I | F | I | S | W | Q | M     | pY | T  | D | D | E | A | E | E | N | F | I  | D  | pY | E  | D | I | L | I |
| I     | D | G | D | S  | pY | S  | F | Q | W | E | F | I | Q | S | N     | T  | pY | N | D | G | T | D | E | S | W | P  | D  | pY | Q  | E | D | T |   |
| D     | W | I | D | P  | pY | N  | E | P | W | V | Q | I | F | X | X     | pY | D  | E | W | D | T | X | X | X | X | X  | X  | X  | X  | X | X | X | X |
| S     | W | I | D | F  | pY | E  | D | Q | V | A | X | X | X | X | X     | pY | E  | D | E | W | I | X | X | X | X | X  | X  | X  | X  | X | X | X | X |
| G     | V | G | E | A  | pY | D  | W | M | D | F | X | X | X | X | X     | pY | E  | D | W | E | R | X | X | X | X | X  | X  | X  | X  | X | X | X | X |
| F     | W | A | D | G  | pY | D  | M | A | N | E | X | X | X | X | X     | pY | E  | D | T | W | A | X | X | X | X | X  | X  | X  | X  | X | X | X | X |
| G     | W | T | D | M  | pY | A  | D | D | L | S | X | X | X | X | X     | pY | D  | D | S | Q | D | X | X | X | X | X  | X  | X  | X  | X | X | X | X |
| V     | P | N | E | T  | pY | W  | D | D | L | Q | X | X | X | X | X     | pY | E  | L | E | P | H | X | X | X | X | X  | X  | X  | X  | X | X | X | X |
| I     | F | Q | D | S  | pY | Q  | S | F | E | E | X | X | X | X | X     | pY | E  | N | D | A | W | D | N | X | X | X  | X  | X  | X  | X | X | X | X |
| G     | P | L | E | M  | pY | S  | F | D | I | E | X | X | X | X | X     | pY | D  | V | W | E | V | X | X | X | X | X  | X  | X  | X  | X | X | X | X |
| D     | D | E | W | L  | pY | E  | V | P | N | E | X | X | X | X | X     | pY | D  | I | A | Q | I | X | X | X | X | X  | X  | X  | X  | X | X | X | X |
| V     | D | E | W | F  | pY | A  | A | D | E | Q | X | X | X | X | X     | pY | E  | E | T | W | D | X | X | X | X | X  | X  | X  | X  | X | X | X | X |
| A     | I | D | Q | A  | pY | E  | E | G | W | F | X | X | X | X | X     | pY | W  | D | V | G | - | X | X | X | X | X  | X  | X  | X  | X | X | X | X |
| V     | I | D | I | I  | pY | E  | D | N | M | W | X | X | X | X | X     | pY | A  | E | T | W | D | X | X | X | X | X  | X  | X  | X  | X | X | X | X |
| A     | H | D | R | V  | pY | D  | W | D | D | F | X | X | X | X | X     | pY | V  | T | D | M | W | X | X | X | X | X  | X  | X  | X  | X | X | X | X |
| W     | F | E | G | P  | pY | D  | M | D | D | T | X | X | X | X | X     | pY | A  | T | D | I | I | X | X | X | X | X  | X  | X  | X  | X | X | X | X |
| F     | T | D | P | W  | pY | E  | M | E | N | D | X | X | X | X | X     | pY | X  | X | X | R | W | X | X | X | X | X  | X  | X  | X  | X | X | X | X |
| P     | S | D | I | M  | pY | S  | I | D | T | E | I | G | S | X | X     | pY | N  | X | X | X | X | X | X | X | X | X  | X  | X  | X  | X | X | X | X |
| N     | P | D | G | W  | pY | M  | Q | W | E | E | X | X | X | X | X     | pY | S  | H | F | X | X | X | X | X | X | X  | X  | X  | X  | X | X | X | X |
| T     | I | D | V | W  | pY | D  | M | D | G | N | E | I | D | W | A     | L  | R  | V | E | D | G | N | I | S | D | D  | pY | W  | S  | D | M | V |   |
| E     | I | D | W | L  | pY | R  | V | E | D | G | A | D | I | A | V     | L  | R  | V | E | D | G | N | I | S | D | D  | pY | Q  | E  | G | F | L |   |
| A     | D | I | A | V  | pY | E  | G | E | W | D | F | E | Q | L | T     | pY | E  | S | F | E | I | A | S | E | F | D  | pY | M  | E  | A | Q | I |   |
| F     | E | Q | L | T  | pY | E  | S | F | E | I | D | D | S | M | E     | R  | V  | E | D | E | R | X | X | X | X | X  | X  | X  | X  | X | X | X | X |
| D     | D | S | M | L  | pY | E  | F | D | R | V | E | E | M | V | S     | pY | D  | P | D | E | R | X | X | X | X | X  | X  | X  | X  | X | X | X | X |
| W     | E | M | V | S  | pY | M  | E | Q | D | E | E | F | P | W | F     | pY | E  | V | D | E | E | H | E | X | X | X  | X  | X  | X  | X | X | X | X |
| H     | E | F | P | W  | F  | pY | A | L | E | E | G | F | N | I | M     | pY | D  | I | D | D | K | I | F | N | I | M  | pY | D  | I  | D | D | K |   |
| I     | F | N | I | M  | pY | D  | I | D | D | K | F | I | N | T | pY    | E  | D  | W | S | E | E | F | I | N | T | pY | E  | D  | W  | S | E | E |   |
| A     | F | W | N | A  | pY | Q  | D | W | Q | E | A | F | W | N | A     | pY | Q  | D | W | Q | E | E | A | F | W | N  | A  | pY | Q  | D | W | Q | E |
| -     | N | F | F | E  | pY | Q  | F | E | G | I | - | D | F | F | E     | M  | pY | D | S | F | L | I | - | D | F | F  | E  | M  | pY | D | S | F | L |
| -     | D | X | X | X  | pY | D  | L | D | L | L | D | X | X | X | X     | pY | D  | L | D | L | L | L | D | X | X | X  | X  | X  | X  | X | X | X | X |
| X     | X | X | X | X  | pY | D  | L | V | I | A | X | X | X | X | X     | pY | D  | L | V | I | A | X | X | X | X | X  | X  | X  | X  | X | X | X | X |
| E     | X | X | X | X  | pY | D  | E | X | X | A | X | X | X | X | X     | pY | D  | E | X | X | A | X | X | X | X | X  | X  | X  | X  | X | X | X | X |
| I     | X | X | X | X  | pY | D  | M | W | D | E | X | X | X | X | X     | pY | D  | M | W | D | E | X | X | X | X | X  | X  | X  | X  | X | X | X | X |
| X     | X | D | S | N  | pY | W  | D | E | R | X | X | X | X | X | X     | pY | W  | D | E | R | X | X | X | X | X | X  | X  | X  | X  | X | X | X |   |
| X     | X | H | X | X  | pY | W  | E | E | W | P | X | X | X | X | X     | pY | W  | E | E | W | P | X | X | X | X | X  | X  | X  | X  | X | X | X |   |
| X     | X | X | X | X  | pY | W  | D | V | V | X | X | X | X | X | X     | pY | W  | D | V | V | X | X | X | X | X | X  | X  | X  | X  | X | X | X | X |
| X     | X | X | X | X  | pY | M  | E | D | A | V | X | X | X | X | X     | pY | M  | E | D | A | V | X | X | X | X | X  | X  | X  | X  | X | X | X | X |
| H     | A | X | X | X  | pY | I  | D | F | E | D | X | X | X | X | X     | pY | I  | D | F | E | D | X | X | X | X | X  | X  | X  | X  | X | X | X | X |
| I     | X | X | X | X  | pY | M  | E | M | D | D | X | X | X | X | X     | pY | M  | E | M | D | D | X | X | X | X | X  | X  | X  | X  | X | X | X | X |
| R     | X | X | X | X  | pY | L  | D | F | S | F | X | X | X | X | X     | pY | L  | D | F | S | F | X | X | X | X | X  | X  | X  | X  | X | X | X | X |
| X     | X | X | X | X  | pY | S  | D | N | A | I | X | X | X | X | X     | pY | S  | D | N | A | I | X | X | X | X | X  | X  | X  | X  | X | X | X | X |
| X     | X | X | X | X  | pY | W  | K | D | E | E | X | X | X | X | X     | pY | W  | K | D | E | E | X | X | X | X | X  | X  | X  | X  | X | X | X | X |
| T     | X | X | X | X  | pY | W  | K | D | E | E | X | X | X | X | X     | pY | W  | K | D | E | E | X | X | X | X | X  | X  | X  | X  | X | X | X | X |
| X     | X | X | X | X  | pY | S  | A | E | E | H | X | X | X | X | X     | pY | S  | A | E | E | H | X | X | X | X | X  | X  | X  | X  | X | X | X | X |
| Q     | X | X | X | X  | pY | S  | A | E | E | H | X | X | X | X | X     | pY | S  | A | E | E | H | X | X | X | X | X  | X  | X  | X  | X | X | X | X |

\*M, Nle; X, residues that could not be unambiguously determined. Acidic, basic, and aromatic residues are shaded in red, blue, and gray, respectively.

**Table S11.** Most Preferred SHP-1 Substrates Selected from Library VI (ANNX<sup>6</sup>X<sup>5</sup>X<sup>4</sup>X<sup>3</sup>X<sup>2</sup>X<sup>1</sup>AABBRM-PEGA; total of 98 sequences from 3 independent screening experiments)<sup>a</sup>

|              |             |           |           |          |
|--------------|-------------|-----------|-----------|----------|
| pYpYpYMGpY   | pYVpYGWpY   | pYSKAIpY  | PpYpYEEpY | VEpYDFpY |
| pYpYpYHMPY   | pYIAPpYpYpY | pYTGLMpY  | SpYpYEVpY | QWpYDDpY |
| pYpYpYGRW    | pYIIpYpYpY  | pYIVDSpY  | VpYpYMNpY | VWpYDGpY |
| pYpYpYNTpY   | pYIEpYVpY   | pYYAESpY* | VpYpYSVpY | DWpYDMpY |
| pYpYpYSWHpY  | pYFNpYFpY   | pYEHGSpY  | XpYpYpYWM | VWpYDVpY |
| pYpYpYAFpY   | pYNPpYWpY   | pYIITSpY  | VpYEpYMpY | DFpYFDpY |
| pYpYpYEVSpY* | pYASpYDpY   | pYEVFTpY  | PpYNpYApY | MWpYGDpY |
| pYpYpYpYpY   | pYITpYWpY   | pYDSSTpY  | WpYApYDS  | TEpYNWpY |
| pYSpYMpYpY   | pYGWpYGpY   | pYTSDVpY  | FpYNTpYpY | WEpYNEpY |
| pYApYpYpY    | pYETpYpY    | pYGTpYpY  | LpYEDWpY  | GIpYQWpY |
| pYEpYpYpY    | pYESpYpY    | pYDQYpY   | IpYIDSpY  | MEpYSSpY |
| pYEpYpYpY    | pYGSIpYpY   | pYAIGWpY  | SpYEFVpY  | SVpYSApY |
| pYYpYpYpY    | pYEWGApY    | pYDVSWpY  | DpYDMpYpY | IDpYVEpY |
| pYHpYpYpY    | pYWVTDpY    | pYSATWpY  | TpYASFpY  | PITApYpY |
| pYIpYpYpY    | pYTRFEpY    | pYSApYpYI | DpYTWepY  | MEESDpY  |
| pYIpYpYpY    | pYEWGGpY    | IpYpYpYpY | YpYXXXpY  | FDFDWpY  |
| pYIpYpYpY    | pYXXXGpY    | DpYpYGLpY | DGpYpYpY  | WDSEApY  |
| pYIpYpYpY    | pYTFpYpY    | DpYpYpYpY | FApYASpY  | DMSESpY  |
| pYTpYpYpY    | pYGSFLpY    | DpYpYQWpY | WSpYADpY* | pYHRHIN  |
| pYTpYpYpY    | pYVEINpY    | GpYpYDNpY |           |          |

<sup>a</sup>M, Nle; X, amino acid whose identity could not be unambiguously determined; Y, F<sub>2</sub>Y.

\*Sequences selected for kinetic analysis.

**Table S12.** Peptides that are resistant to SHP-1 or SHP-2 dephosphorylation (colorless beads selected from Library II, W[ST][DE][DE]VpYXXXX-LNBBRM-PEGA)

| SHP1 |      |      |      | SHP2 |      |      |
|------|------|------|------|------|------|------|
| WHFA | MMMI | DYDQ | RKMT | MRYF | WRII | WWNM |
| LFFF | MYRI | FSDQ | YMRV | SFMF | WQMI | WWKN |
| VYHF | FRFK | FTFR | IVRV | IMMF | WRVI | WNFQ |
| LLKF | WIYK | FWYR | LVRV | MAWF | FKWI | RRKS |
| FHLY | NGTK | VRKR | IMRV | FTWF | IIMK | WWKS |
| KMTY | FYHM | FSMR | MIVV | IYFY | LVMK | FRYT |
| IHWY | YYIM | FIRR | WVWV | VFTY | IFHL | VMHV |
| YVWY | FFMM | YIRR | IHKW | WFMG | VILL |      |
| IWMG | FYRM | MYFT | WFQW | FRAI | IIMM |      |

M, Nle; Y, F<sub>2</sub>Y.

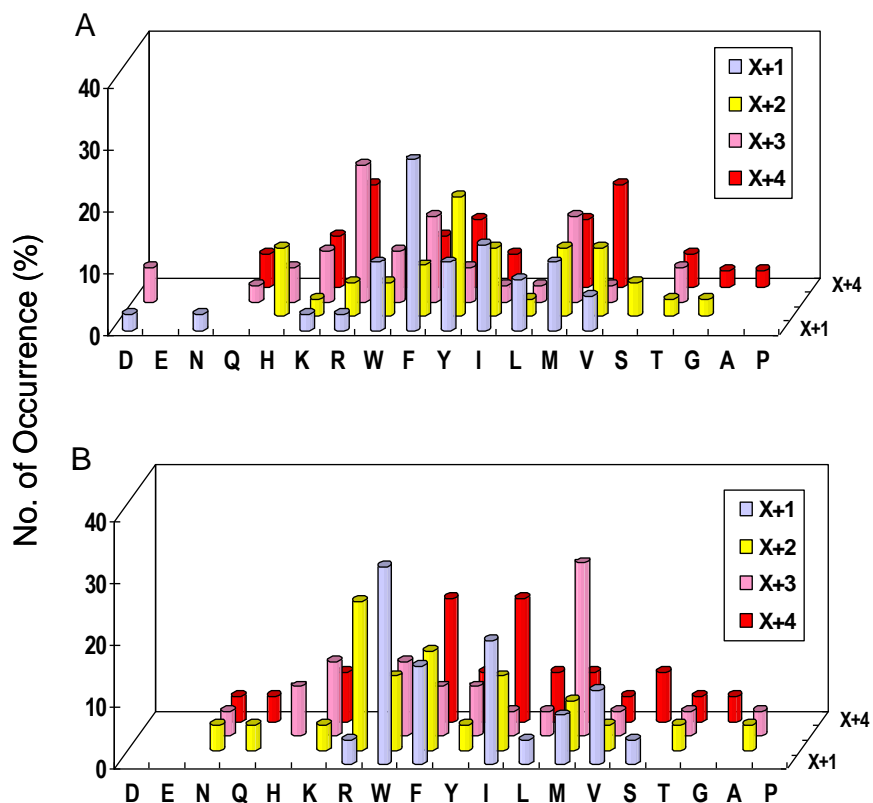

**Figure S3.** Amino acid composition of the peptide sequences that are resistant to SHP-1 (A) or SHP-2 action (B) (colorless beads selected from library II, W[ST][DE][DE]VpYXXXX-LNBBRM-PEGA). The y axis represents the percentage of selected peptides that contained a particular amino acid (x axis) at a given position within the peptide (pY+1 to pY+5, on the z axis). M, Nle; Y, F<sub>2</sub>Y.

**Table S13.** Most Preferred RPTP $\alpha$  Substrates Selected from Library I (SAX<sub>5</sub>pYAABBRM-resin)<sup>a</sup>

|       |       |       |
|-------|-------|-------|
| RRKPF | KSRFF | KRXXX |
| VKQWR | NKRFF | IVRRW |
| RRAXX | FRPKF | RHXXX |
| FWKKN | FHRKF | MRWRN |
| KNWRR | RSRIF | RKQWR |
| KKFNW | WRAQR | RIKAW |
| RFRNI |       |       |

<sup>a</sup>M, Nle; X, unidentified amino acids; Y, F<sub>2</sub>Y.**Table S14.** Most Preferred RPTP $\alpha$  Substrates Selected from Library VII (Alloc-ASX<sub>5</sub>pYAABBRM-resin, with reduced Arg and Lys contents)<sup>a</sup>

|       |       |       |       |       |       |
|-------|-------|-------|-------|-------|-------|
| ALSID | VSGEA | TVDHT | SGNSQ | IEWTG | TGDTM |
| TWDAG | IFIFP | TWGHE | STNSE | IEWTG | TNGTG |
| DWYDI | TWDFP | TWAHD | SWDSV | LEPTM | TNGTG |
| ETGDA | WMEFD | NWDIF | TEQSL | LHETI | TTITA |
| FNLDW | ITSGI | WEAID | TWTSA | LVNVA | VHPTD |
| LWEDI | MVTGP | IIEKY | WAFSD | MEITA | VMETE |
| MWSDF | NISGP | MLEKY | WIESG | MVSTA | VMETM |
| QEGDW | NQWGM | EMELF | AFETG | MVATA | VPHTA |
| TFHDI | TFGGH | LESLF | AVETA | MWETA | DDYWY |
| TGLDS | TNAGS | AEINW | DIHTA | NFITA | DFYWE |
| TSFDD | TYTGD | IWDNV | EIDTA | NHTTA | DWDWW |
| TSWDV | WLTGP | MYENI | EMETI | PFVTP | ESHWQ |
| WDFDF | YMYGD | TSYNN | ENDTA | QIATA | SDMWS |
| ARSEL | NTYHR | TAEQA | EVPTA | SDHTA | SFSWP |
| ESMEL | SAIHD | TLGQM | FEETM | SDGTS |       |
| FDWEW | SDSHS | FESSM | FPETG | SEVTI |       |
| SGTEP | TDAHM | FMSSA | HQVTA | SEWTL |       |
| TGIEM | TDQHF | GELSF | HYITT | SHSTG |       |

<sup>a</sup>M, Nle; X, unidentified amino acids; Y, F<sub>2</sub>Y.

**Table S15.** Most Preferred RPTPa Substrates Selected from Library IV (AX<sub>5</sub>pYX<sub>5</sub>NNBBRM)<sup>a</sup>

| At 150 mM NaCl |               |               |               |
|----------------|---------------|---------------|---------------|
| LTIAQpYRMRKR   | QTKRNpYARRRQ  | XXXXWpYQFKHK  | AKIGHpYFARFR  |
| NWMKKpYGRRMN   | KREFWpYRSPNR  | MHRHIpYHRTRM  | VPWQNpYANRFR  |
| MRNGApYFRRRK   | XXXXXpYIKINN  | XXXXXpYRNTXX  | KRRHMpYLGRL   |
| IMTNFpYKNNRR   | QMPSFpYMRMRM  | TKFAEpYRRRI P | NPKVApYKRFLR  |
| IDDRMpYKRNR F  | XXXXIpYRRKIR  | PRHNWpYGAHRM  | MRI RTpYRGPKA |
| WQGPSpYLRTRK   | RSTFIpYRRKDR  | ITDLLpYNQGGL  | FHNWKpYGRLRK  |
| RHRNWpYQKSIR   | XXXXXpYMRRHR  | KKQIWpYQSQKR  | FRANA pYRRTXX |
| PFPGLpYRHRHR   | XXXXXpYKRDKK  | IQTIHpYRNRRM  | KRFPLpYLNKRF  |
| XXXXXpYMKKTR   | XXXXIpYRRKRI  | XXXXXpYRKTRR  | KRRNWpYGGERF  |
| RFNQWpYQKKGW   | QLKPFpYAMKRF  | KTANI pYRFSRV |               |
| RIMGQpYRRPIR   | RVSHMpYHFKRA  | PNNIKpYRSRRR  |               |
| At 300 mM NaCl |               |               |               |
| FQRQKpYRRRXX   | XXXXNpYVPWRK  |               |               |
| GNVIWpYRNQGP   | MPKPRpYMMVXX  |               |               |
| XXKKFpYRKGA K  | RLRRFpYGIANR  |               |               |
| HPRLMpYKRNFV   | XDKR VpYRHKNR |               |               |
| NRKKWpYGIRQA   | ARRPFpYKARKR  |               |               |
| TARFKpYAKRRH   | GHNDVpYDKRVK  |               |               |
| ERRKFpYRWRGT   | STHHKpYRRRFL  |               |               |
| At 500 mM NaCl |               |               |               |
| PKRLMpYRISQK   | NRISLpYRENRR  |               |               |
| RVKRFpYARTNK   | PWNNMpYAPNWT  |               |               |
| XXRPLpYXXQHK   | XXXXXpYSPKNR  |               |               |
| XXXXIpYKTKRR   | NSMGIpYKDRWK  |               |               |
| DTRAFpYGWPRK   | XXTTRpYGVNKR  |               |               |
| KRQQVpYESRRW   | VPNRVpYXXXWQ  |               |               |
| RPNI R pYQSRRF | WGGQMpYRRQIS  |               |               |

<sup>a</sup>M, Nle; X, unidentified amino acids; Y, F<sub>2</sub>Y.

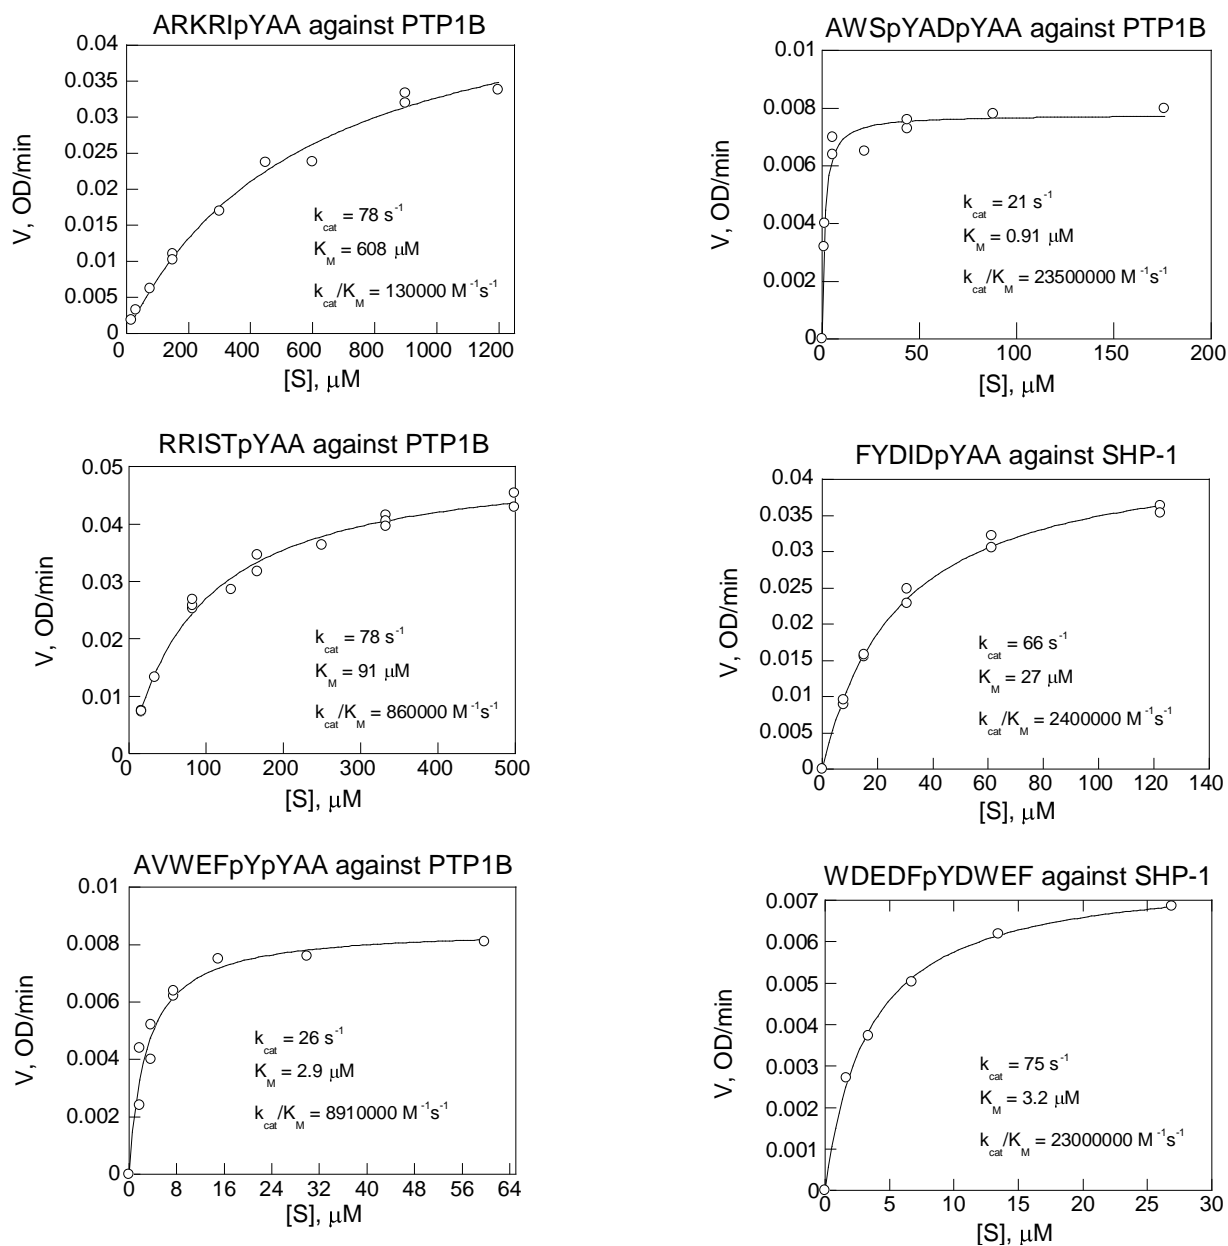

**Figure S4.** Representative  $V$  vs  $[S]$  plots for PTP1B and SHP-1 against pY peptides.
